# Supplementary material
Source: publisher figshare collection journal article supplement (https://tandf.figshare.com/ndownloader/files/20721867)
Supplement: Supplementary file 1 [file 20721867]

## Supplementary Materials to Hidden Markov Model in Multiple Testing on Dependent Count Data

(Received 00 Month 20XX; final version received 00 Month 20XX)

### 1. Results of Case 3 in Section 4.2.2

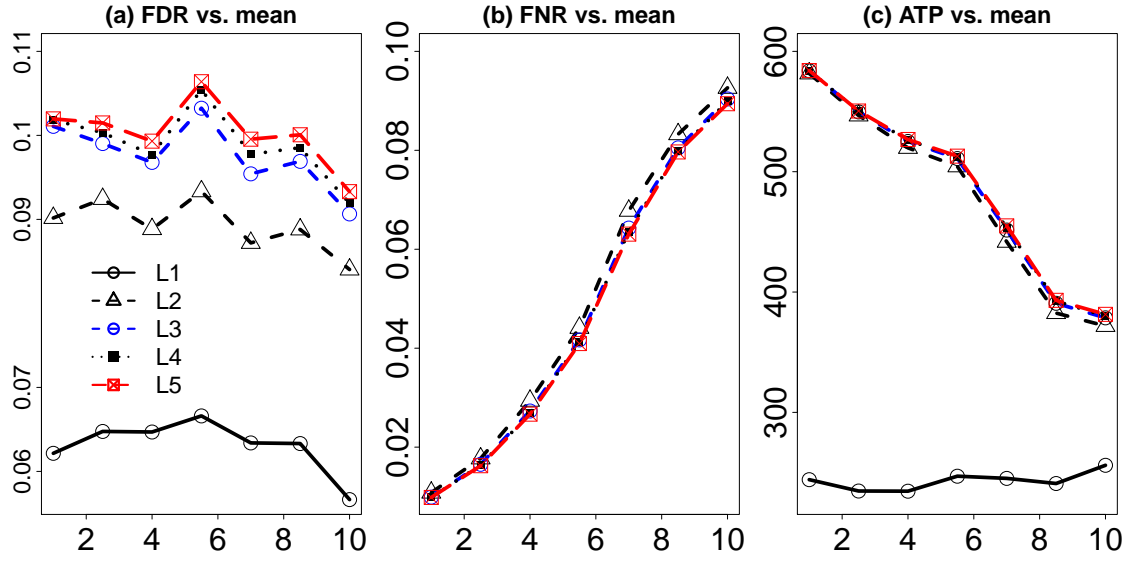

Figure 1. Comparison of FDR, FNR and ATP under different components using FB test procedure.  $a_{11}$  fixed at 0.8 and non-null distribution is  $f_1 = 0.4 * \text{Poisson}(\mu_{11}) + 0.3 * \text{Poisson}(20) + 0.3 * \text{Poisson}(25)$  with  $\mu_{11}$  varying from 1 to 10: FDR, FNR and ATP vs  $\mu_{11}$ .

Table 1. Model selection:  $L = 3$  case

| Method                          | Fitted Model |           |           |          |          |
|---------------------------------|--------------|-----------|-----------|----------|----------|
|                                 | L=1          | L=2       | L=3       | L=4      | L=5      |
| $\log p_{BS}(\mathbf{X} M_L)$   | —            | 328 (98%) | 6 (2%)    | —        | —        |
| $\log p_{IS}(\mathbf{X} M_L)$   | —            | 323 (97%) | 11 (3%)   | —        | —        |
| $\log p_{RI}(\mathbf{X} M_L)$   | —            | 328 (98%) | 6 (2%)    | —        | —        |
| $\log p_{HM}(\mathbf{X} M_L)$   | —            | 40 (12%)  | 141 (42%) | 79 (24%) | 74 (22%) |
| $\log p_{HM_2}(\mathbf{X} M_L)$ | —            | 68 (20%)  | 156 (47%) | 80 (24%) | 30 (9%)  |
| $BIC_L$                         | 90 (26%)     | 256 (73%) | 4 (1%)    | —        | —        |

<sup>a</sup> Non-null distribution is  $f_1 = 0.4 * \text{Poisson}(\mu_{11}) + 0.3 * \text{Poisson}(20) + 0.3 * \text{Poisson}(25)$  with  $\mu_{11}$  varying from 1 to 10. The true number of components is  $L = 3$ .
